# Supplementary material for: A pilot study: effect of irisin on trabecular bone in a streptozotocin-induced animal model of type 1 diabetic osteopathy utilizing a micro-CT
Source: PeerJ journal article supplement (doi:10.7717/peerj.16278), 2023-10-17
Supplement: DataS1.pdf [file DataS1.pdf]

| Groups | Lane | SOST     | GAPDH    | Normalized SOST expression |
|--------|------|----------|----------|----------------------------|
| NUT    | 1    | 1924.175 | 1315.305 | 1.463                      |
| NUT    | 2    | 3355.974 | 1875.891 | 1.789                      |
| NUT    | 3    | 3064.853 | 1688.477 | 1.815                      |
| NT     | 4    | 4323.459 | 1514.184 | 2.855                      |
| NT     | 5    | 3252.325 | 1273.859 | 2.553                      |
| NT     | 6    | 3312.754 | 1166.251 | 2.841                      |
| DMUT   | 7    | 5940.711 | 2024.426 | 2.935                      |
| DMUT   | 8    | 7441.974 | 1831.841 | 4.063                      |
| DMUT   | 9    | 6037.69  | 1767.77  | 3.415                      |
| DMT    | 10   | 2746.79  | 2250.033 | 1.221                      |
| DMT    | 11   | 2424.104 | 2137.619 | 1.134                      |
| DMT    | 12   | 2025.121 | 1714.379 | 1.181                      |

Suppl Data 1a: Densitometric measurements of SOST western blot

SOST

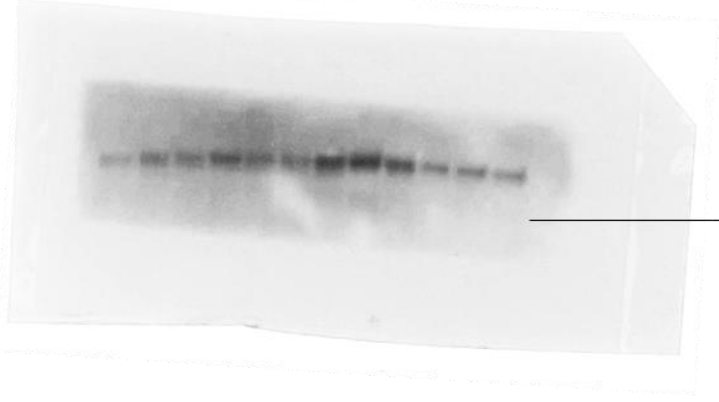

25KD

GAPDH

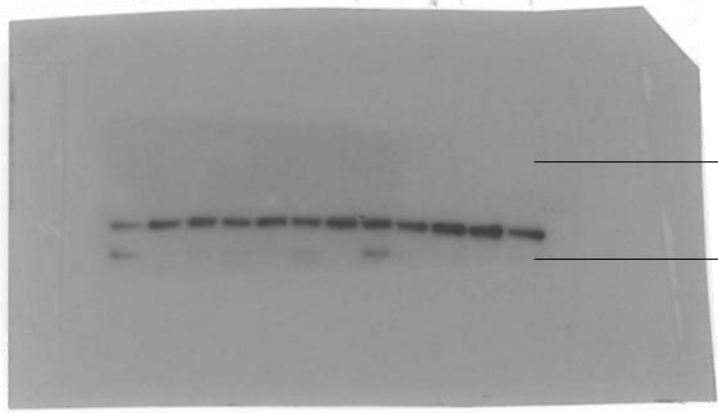

50KD

37KD

Supp Data 1b: Uncut Western blot for SOST & GAPDH
