# Supplementary material for: A pilot study: effect of irisin on trabecular bone in a streptozotocin-induced animal model of type 1 diabetic osteopathy utilizing a micro-CT
Source: PeerJ. 2023 Oct 17;11:e16278. doi: 10.7717/peerj.16278 (PMC10588705; doi:10.7717/peerj.16278)
Supplement: Supplemental Information 4 [file peerj-11-16278-s004.xlsx]

## Sheet: Raw Data ELISA PCR Western CT
Elisa for Serum Osteocalcin
Gp I	Gp II	Gp III	Gp IV
6983.91	6735.64	6183.62	6497.44
7031.81	6444.51	6382.75	6643.63
6746.98	6578.1	6315.95	6930.98
	7204.47
	6915.86
Elisa for Bone Osteocalcin
Gp I	Gp II	Gp III	Gp IV
6.04554	8.78754	2.07117	2.77978
10.1739	13.1008	4.59751	4.13537
8.47945	9.98909	4.41266	6.1
Elisa for Serum CTx1
Gp I	Gp II	Gp III	Gp IV
4.40309	9.01097	7.59357	4.79527
3.04122	4.51467	7.04045	9.60432
3.73226	11.972	7.57374	9.62995
	21.7823
Elisa for Bone CTx1
Gp I	Gp II	Gp III	Gp IV
47	74.3	81.5	56.4
49.8	68.1	96.2	69.2
44.2	57.7	66	57.2
RTPCR- SOST
Gp I	Gp II	Gp III	Gp IV
0.000133377	6.58653e-05	0.000489862	3.73232e-05
0.000111465	2.0262e-05	0.000214484	1.26201e-05
0.000121556	1.1144e-05	0.000105897	3.47404e-05
			4.23844e-05
Western blot SOST
Gp I	Gp II	Gp III	Gp IV
1.46291	2.85531	2.93452	1.24078
1.789	2.55313	4.06257	1.11402
1.81516	2.84052	3.41543	1.18126

## Sheet: MICRO CT Complete Data
	Background	Isosurface	Material	Volume (mm3)	Total Volume (mm3)	Surface area (mm2)	Closed Surface area (mm2)	Surface area difference (mm2)	Dimensions (mm)				BV/TV	BS/BV (1/mm)	TbTh (mm)	TbN (1/mm)	TbSp (0.114014)	Mean Greyscale	Std Dev
FB SM RAT1 fhead	68.34	132.65	196.96	1.04	1.31	23.03	29.19	6.17	0.9	0.61	4.57		0.442247	22.1233	0.0904024	4.89198	0.114014	181.72	24.89
FB SM RAT2 fhead2	75.09	138.57	202.04	1.78	1.45	32.73	40.89	8.15	0.74	1.06	4.29		0.550789	18.3781	0.108825	5.06123	0.0887553	187.41	23.58
FB SM RAT3 fhead1	73.18	133.68	194.18	1.23	0.99	21.27	28.43	7.16	0.89	0.67	3.95		0.554611	17.227	0.116097	4.77714	0.0932333	182.82	23.38
FB SM RAT4 fhead	75.32	138.96	202.6	1.31	1.24	24.14	31.51	7.37	0.94	0.62	4.63		0.514373	18.447	0.108419	4.74431	0.10236	187.57	22.79
FB SM RAT5 fhead	74.65	135.28	195.9	1.35	1.78	26.01	33.27	7.26	1	0.71	4.62		0.430167	19.3128	0.103558	4.15386	0.137181	181.57	24.26
FB SM RAT6 fhead	80.94	141.97	203	1.73	1.01	23.97	34.58	10.62	0.85	0.68	4.96		0.63207	13.8232	0.144684	4.36862	0.0842212	191.81	23.08
FB SM RAT7 fhead	74.69	138.36	202.03	0.71	0.95	18.18	22.66	4.48	0.85	0.48	4.36		0.427038	25.6269	0.0780429	5.47184	0.104711	184.45	25.8
FB SM RAT8 fhead	69.99	126.23	182.47	1.59	2.24	42.16	50.15	8	1.11	0.77	4.72		0.414706	26.5633	0.0752919	5.50798	0.106263	173.97	27.7
FB SM RAT9 fhead	75.91	132.74	189.58	1.04	1.62	24.98	31.06	6.07	1.03	0.61	4.46		0.390899	23.9731	0.0834268	4.68553	0.129996	180.85	27.75
FB SM RAT10 fhead	71.08	134.58	198.08	1.44	2.5	29.9	37.91	8.01	0.96	0.73	5.96		0.366641	20.7015	0.0966114	3.79501	0.166893	181.05	24.42
FB SM RAT11 fhead	62.04	108.16	154.28	1.27	3	36.49	42.77	6.28	0.92	0.95	5.1		0.296912	28.8165	0.0694047	4.27798	0.16435	165.4	36.99
FB SM RAT12 fhead	69.63	123.23	176.83	1.04	1.94	27.82	33.74	5.92	0.88	0.73	4.88		0.349254	26.6644	0.0750064	4.65632	0.139756	172.88	30.02
	Individual scans can be viewed at cranfield repository
		https://doi.org/10.17862/cranfield.rd.22734764.v1.
